# Supplementary material for: Artificial intelligence guided conformational mining of intrinsically disordered proteins
Source: PubMed Central journal article supplement (PMC9209487; doi:10.1038/s42003-022-03562-y), 2022-06-20
Supplement: 42003_2022_3562_MOESM4_ESM.pdf [file 42003_2022_3562_MOESM4_ESM.pdf]

## **Description of Additional Supplementary Files**

**File Name:** Supplementary Data 1

**Description:** The source data behind the graphs in the paper
